# Supplementary material for: A1CF Binding to the p65 Interaction Site on NKRF Decreased IFN-β Expression and p65 Phosphorylation (Ser536) in Renal Carcinoma Cells
Source: MDPI journal article supplement (doi:10.3390/ijms25073576), 2024-03-22
Supplement: s1 [file s1]

## Supplementary Materials:

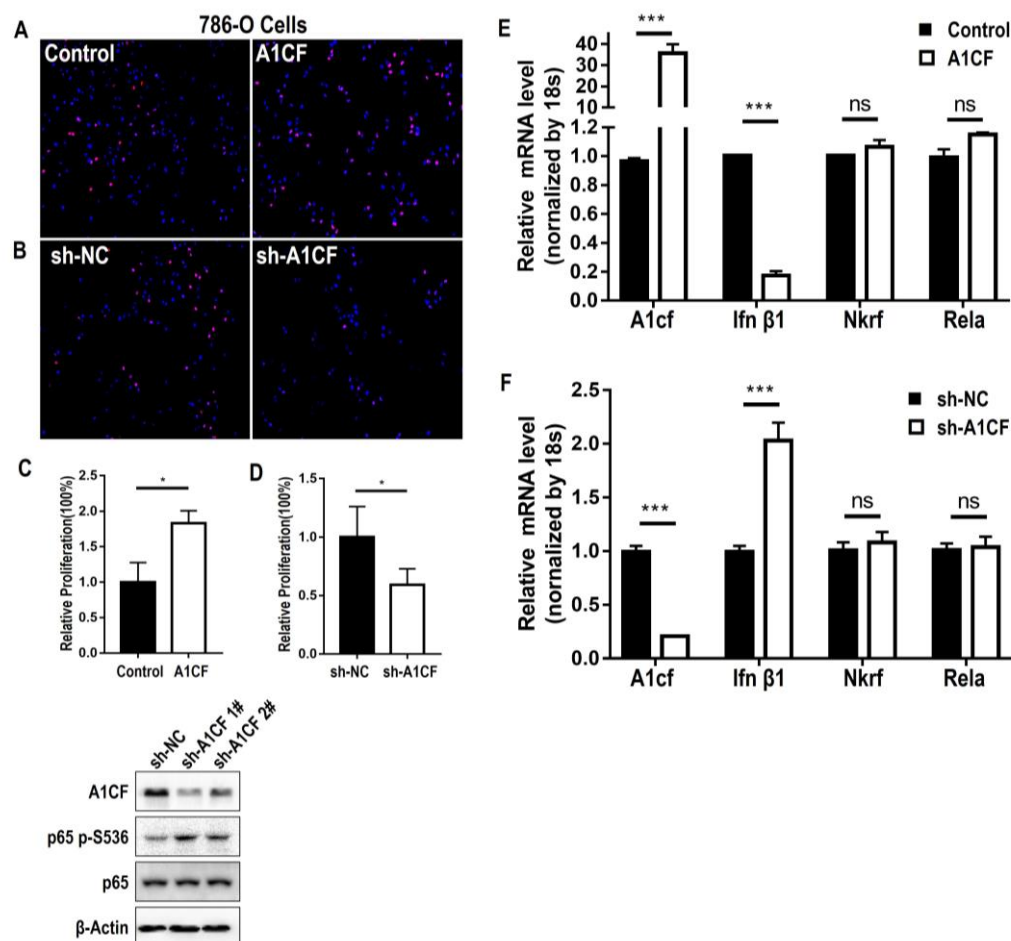

**Figure S1.** A1CF controlled cell growth through negative regulation of IFN- $\beta$  via NF- $\kappa$ B signaling activation A-D Growth of 786-O stable cells were measured by EdU assay. Results were expressed as mean  $\pm$  SEM from 3 replicate well. p-values were calculated by Student t-test, \* $p < 0.05$ . (A). Merged image of EdU staining (red) and Hoechst staining (blue) for 786-O A1CF overexpression stable cells. (B). Merged image of EdU staining (red) and Hoechst staining (blue) for 786-O A1CF deficiency stable cells. (C, D). Statistical analysis of 786-O cell proliferation. Values were presented as mean  $\pm$  SEM ( $n = 3$ ). p-values were calculated by Student t-test, \* $p < 0.05$ . (E). 786-O cells expressing sh-NC, sh-A1CF1#, sh-A1CF2# were examined by western blotting with the indicated antibodies. (F, G). mRNA levels of indicated genes in 786-O stable cells were measured by RT-qPCR. The data are presented as means  $\pm$  SD from triplicate samples. \*\*\* $p < 0.001$ .

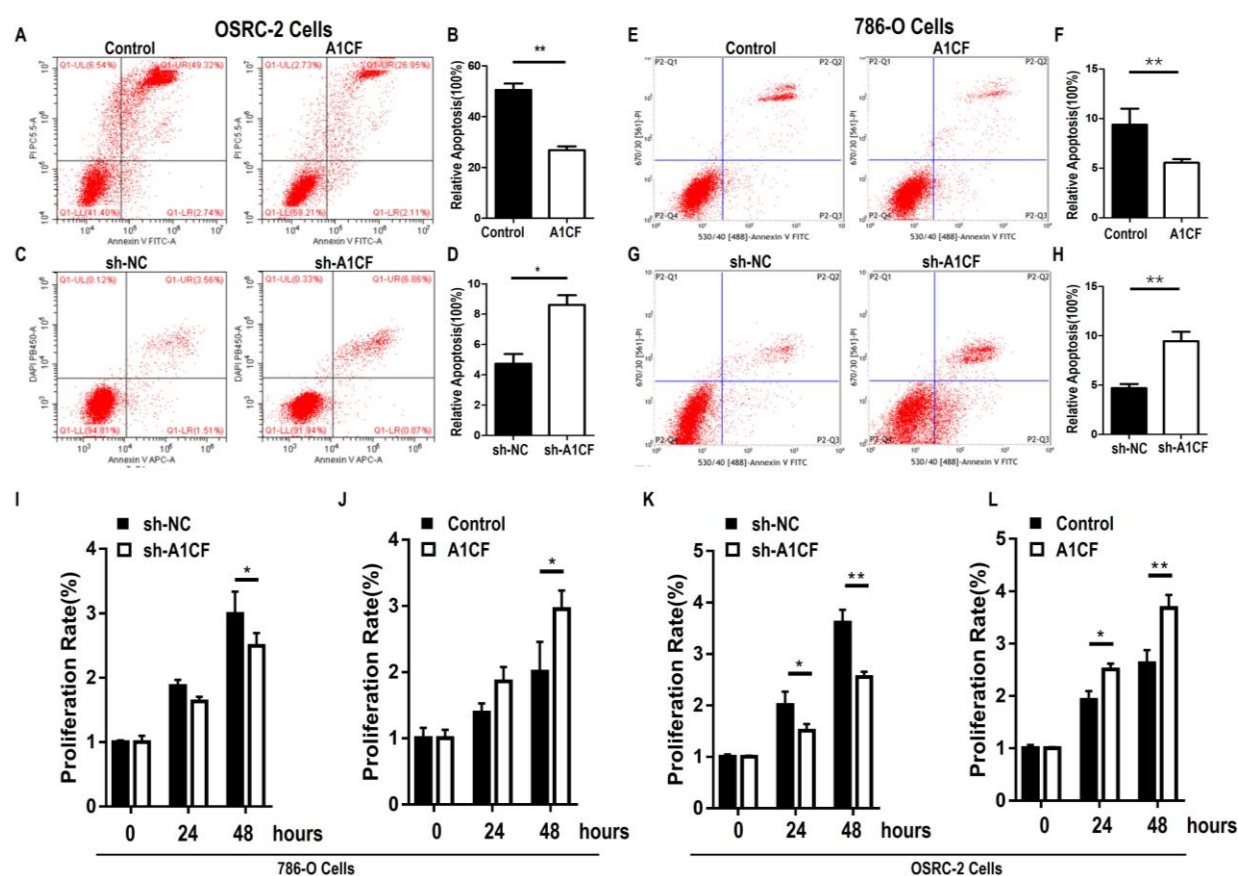

**Figure S2.** A1CF promoted proliferation and inhibited apoptosis in stable renal cells. **(A–H)** Apoptosis of stable renal cancer cells were measured by flow cytometry with Annexin V-PI staining. Results were expressed as mean  $\pm$  SEM from 3 replicates. p-values were calculated by Student t-test, \* $p < 0.05$ , \*\* $p < 0.01$ . **(A)**. Flow cytometry analysis was performed to evaluate the percentage of apoptotic cells in OSRC-2 A1CF overexpression stable cells. **(C)**. Flow cytometry analysis was performed to evaluate the percentage of apoptotic cells in OSRC-2 A1CF deficiency stable cells. **(B, D)**. Statistical analysis of cell apoptosis in OSRC-2 stable cell lines and histogram was drawn in GraphPad Prism 5. Values were presented as mean  $\pm$  SEM ( $n = 3$ ). p-values were calculated by Student t-test, \* $p < 0.05$ . **(E)**. Flow cytometry analysis was performed to evaluate the percentage of apoptotic cells in 786-O A1CF overexpression stable cells. **(G)**. Flow cytometry analysis was performed to evaluate the percentage of apoptotic cells in 786-O A1CF knockdown stable cells. **(F, H)**. Statistical analysis of cell apoptosis in 786-O stable cell lines and histogram was drawn in GraphPad Prism 5. Values were presented as mean  $\pm$  SEM ( $n = 3$ ). p-values were calculated by Student t-test, \*\* $p < 0.01$ . **(I–L)**. Proliferation of stable renal cancer cells were measured by MTT assay. Results were expressed as mean  $\pm$  SEM from 6 replicate well. p-values were calculated by Student t-test, \* $p < 0.05$ ; \*\* $p < 0.01$ . **(I, J)**. 786-O stable cell lines indicated above were seeded on 96-well plates and cell viability was measured by MTT assays at 0, 24, 48 hours. **(K, L)**. OSRC-2 stable cell lines indicated above were seeded on 96-well plates and cell viability was measured by MTT assays at 0, 24, 48 hours.

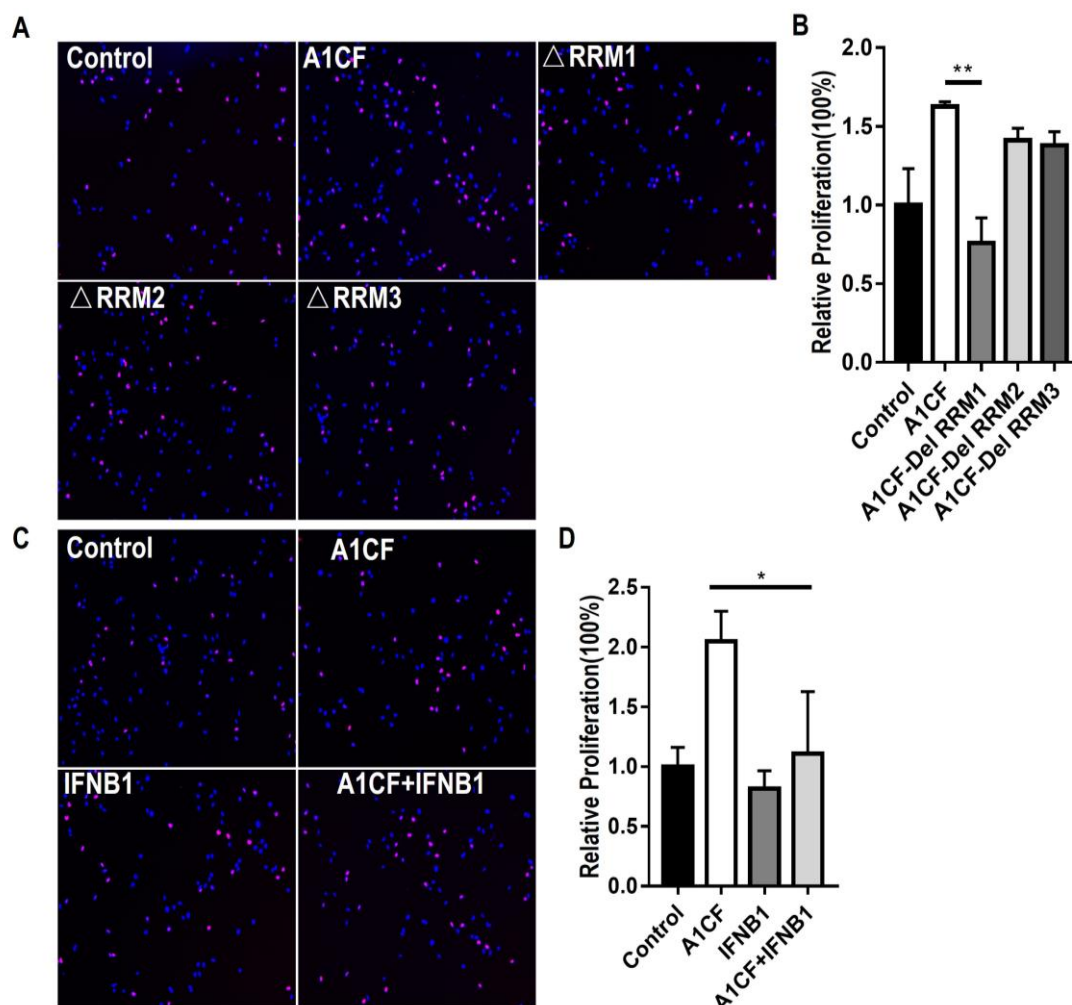

**Figure S3.** Disrupting the A1CF-NKRF interaction changed the renal cancer cell proliferation measured by EdU assay through A1CF-NKRF- NF- $\kappa$ B- IFN- $\beta$  axis. (A-D). Growth of 786-O cells expressing the indicated plasmids were measured by EdU assay. Results were expressed as mean  $\pm$  SEM from 3 replicate well. p-values were calculated by Student t-test, \*p < 0.05. (A). Merged image of EdU staining (red) and Hoechst staining (blue) for 786-O cells expressing indicated A1CF  $\Delta$ RRM mutants. (C). Merged image of EdU staining (red) and Hoechst staining (blue) for 786-O cells expressing indicated plasmids. (B, D). Statistical analysis of 786-O cell proliferation. Values were presented as mean  $\pm$  SEM (n = 3). p-values were calculated by Student t-test, \* p < 0.05.

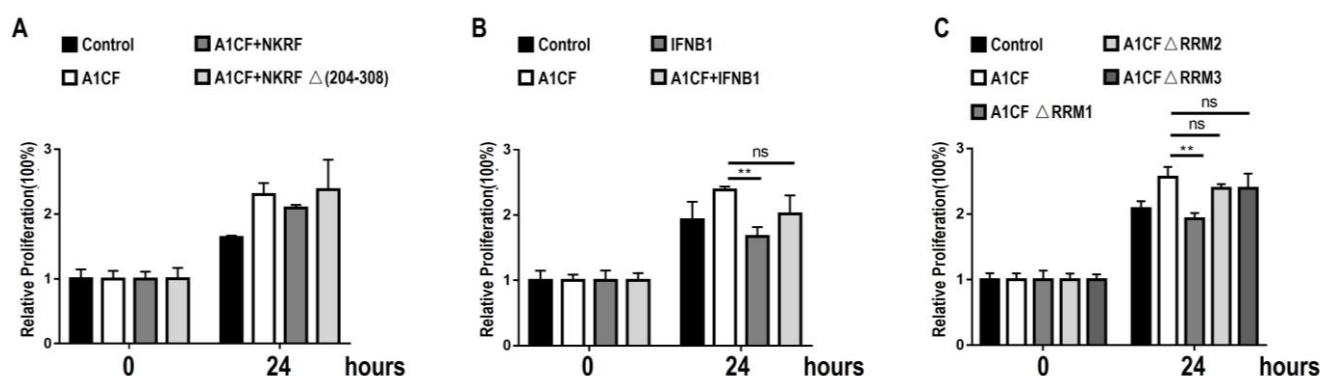

**Figure S4.** Disrupting the A1CF-NKRF interaction changed the renal cancer cell proliferation measured by MTT assay through A1CF-NKRF- NF-κB- IFN-β axis. (A-C). Proliferation of 786-O cells expressing the indicated plasmids were measured by MTT assay. Cells indicated above were seeded on 96-well plates and cell viability was measured at 0, 24 hours. Results were expressed as mean ± SEM from 6 replicate well. p-values were calculated by Student t-test, ns=no significance; \*\*p < 0.01.

**Table S1:** Primers used for plasmid constructs in this paper

| Primer Name                    | Sequence                                                           |
|--------------------------------|--------------------------------------------------------------------|
| F-h.A1CF CDS                   | 5'-GGATCCGAATTCATGGAATCAAATCACAAATCCG-3'                           |
| R-h.A1CF CDS                   | 5'-ATGGTGGTGCTCGAGTCAGAAGGTGCCATATCCATC-3'                         |
| F-h.A1CF-truncation(1-293aa)   | 5'-GGATCCGAATTCATGGAATCAAATCACAAATCCGGGGA-3'                       |
| R-h.A1CF-truncation(1-293aa)   | 5'-ATGGTGATGGTGGTGTATTATAACCATCCAGCACCTTGCCAT-3'                   |
| F-h.A1CF-truncation(294-586aa) | 5'-GGATCCGAATTCCTCCCCATTGAAGTCACCCTAGCAAA-3'                       |
| R-h.A1CF-truncation(294-586aa) | 5'-ATGGTGATGGTGGTGTGTCAGAAGGTGCCATATCCATCCCCTC-3'                  |
| R-H.A1CF(1-130aa)              | 5'-ATGGTGATGGTGGTGTATTATAACAAACCCCTAAGAGGCGCCCATTT-3'              |
| R-H.A1CF(131-220aa)            | 5'-GGATCCGAATTCGCCAGTGTGGACAACCTGCCGATTAT-3'                       |
| R-H.A1CF(131-220aa)            | 5'-ATGGTGATGGTGGTGTATTAACTTCTGGCTCTGCCAGTCTCCTG-3'                 |
| F-h.A1CF(221-293aa)            | 5'-GGATCCGAATTCGAAGTTGATGAAGATACAATGTCT-3'                         |
| F-h.NKRF CDS                   | 5'-GGATCCGAATTCATGGGCTTTATGTTACCTCTCATCT-3'                        |
| R-h.NKRF CDS                   | 5'-ATGGTGATGGTGGTGTTC AATTTGCTTGAGGCATAACAAGC-3'                   |
| R-h.NKRF(1-204aa overlap)      | 5'-ACACACCACGAGGTCTTCTGGATTAGAAAGGTTCTTCCAG-3'                     |
| F-h.NKRF(308aa-end)            | 5'-GACCTCGTGGTGTGTCAGATTGGCA-3'                                    |
| F-h.IFNβ1 CDS                  | 5'-GGATCCGAATTCAGGCGACACTGTTTCGTGTTGTCAAC-3'                       |
| R-h.IFNβ1 CDS                  | 5'-ATGGTGATGGTGGTGGCCAGAGGCACAGGCTAGGAGATCT-3'                     |
| F-A1CF shRNA#1                 | 5'-CCGGCCATGCTGCAAGGAGAGTATACTCGAGTATACTCTCCTTGCAGCATGGTTTTG-3'    |
| R-A1CF shRNA#1                 | 5'-AATTCAAAAACCATGCTGCAAGGAGAGTATACTCGAGATACTCTCCTTG CAGCATGG-3'   |
| F-A1CF shRNA#2                 | 5'-CCGGGCTGCTGCTGCTACTGCTTTC CTCGAG GAAAGCAGTAGCAGCAGCAGCTTTTTG-3' |
| R-A1CF shRNA#2                 | 5'-AATTCAAAAAGCTGCTGCTGCTACTGCTTTC CTCGAG GAAAGCAGTAGCAGCAGCAGC-3' |

**Table S2:** Primers used for qPCR in this paper

| Primer Name | Sequence                        |
|-------------|---------------------------------|
| A1CF-s      | 5'-TGTCATCGTCTACCCAAGCG-3'      |
| A1CF-as     | 5'-GCTCTGCCCAGTCTACTGC-3'       |
| IFNB1-s     | 5'-TCTTTCCATGAGCTACAACCTTGCT-3' |
| IFNB1-as    | 5'-GCAGTATTCAAGCCTCCCATTTC-3'   |
| RELA-s      | 5'-TTTCTCCTCAATCCGGTGAC-3'      |
| RELA-as     | 5'-ACCCCTCCCTACGCAGAC-3'        |
| NKRF-s      | 5'-CCAAACCTTCCAAAGGTCAA-3'      |
| NKRF-as     | 5'-CAGGGTTCCCACTGTCAAAA-3'      |
| 18s-s       | 5'-GTAACCCGTTGAACCCCATTC-3'     |
| 18s-as      | 5'-CCATCCAA TCGGTAGTAGCG-3'     |
